# Supplementary material for: Ultrafine β-AgVO3 nanoribbons derived from α-AgVO3 nanorods by water evaporation method and its application for lithium ion batteries
Source: Royal Society of Chemistry journal article supplement (doi:10.1039/c4ra12472c), 2014-12-05
Supplement: c4ra12472c1.pdf [file c4ra12472c1.pdf]

**Ultrafine  $\beta$ -AgVO<sub>3</sub> nanoribbons derived from  $\alpha$ -  
AgVO<sub>3</sub> nanorods by water evaporation method and  
its application for lithium ion batteries**

**Supporting Information**

Zeng Hui, Wang Qiang\*, Rao Yuayuan

Hefei Guoxuan High-Tech. Power Energy CO. LTD., Hefei, Anhui 230011, People's

Republic of China

---

\*Corresponding author. Dr. Qiang Wang

*E-mail:* wangqiang810418@163.com

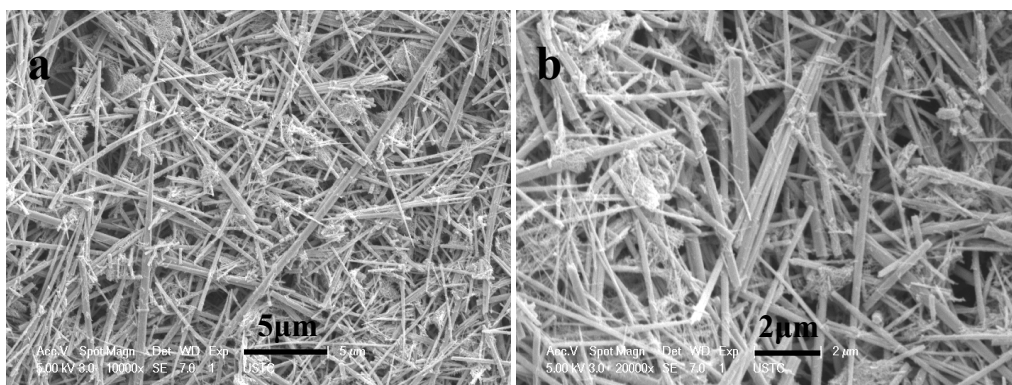

Fig. S1 FESEM images of the  $\alpha$ -AgVO<sub>3</sub> nanorods.

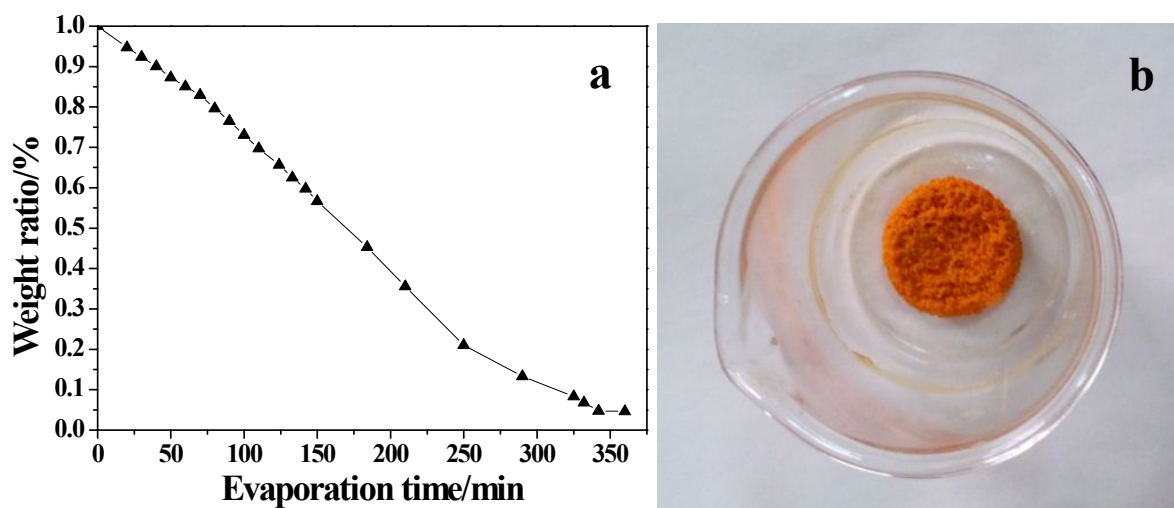

Fig. S2 (a) the relationship between evaporation time and weight ratio, (b) photography of the as-prepared samples after kept in a fan-forced oven at 100 °C for

6h.

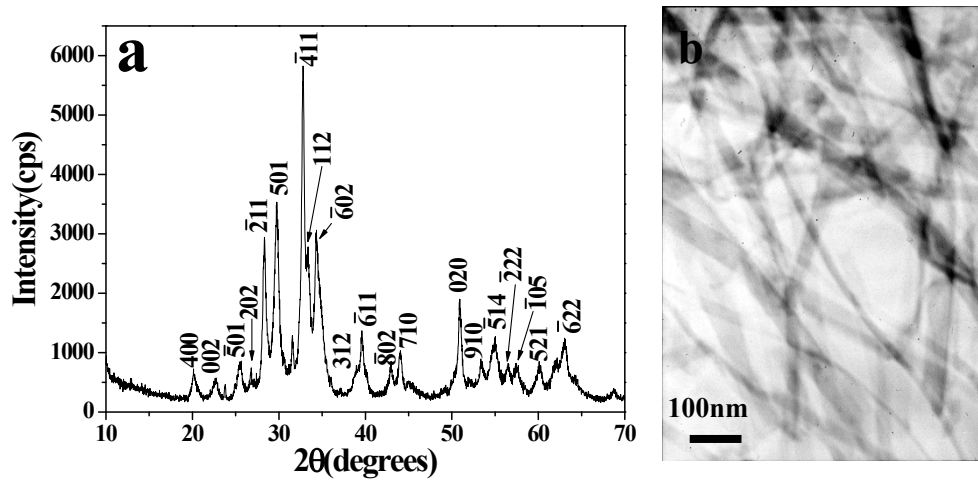

Fig. S3 (a) XRD pattern and (b) TEM image of  $\beta$ -AgVO<sub>3</sub> nanoribbons after calcination at 300 °C in air for 5h.
